# Supplementary material
Source: HighWire-hosted journal article supplement (https://cmaj.ca/highwire/filestream/58576/field_highwire_adjunct_files/0/2-1.pdf)
Supplement: 2-1.pdf [file 2-1.pdf]

## CAS

# Maladie de Kikuchi-Fujimoto : la lymphadénopathie dans la fratrie

Allison Stasiuk BSc Pharm, Susan Teschke MD, Gaynor J. Williams MD MPhil, Matthew D. Seftel MD MHP

**Intérêts concurrents :**  
Aucun déclaré.

Cet article a été revu par les pairs.

**Correspondance à :**  
D<sup>r</sup> Matthew D. Seftel,  
matthew.seftel@cancercare.mb.ca

**CMAJ 2011.**  
**DOI:10.1503/cmaj.091347**

## Patiente 1

Une femme autochtone de 19 ans présentait depuis trois semaines une enflure des glandes du cou, des nausées, des vomissements, des frissons et une perte de poids. À l'examen, elle présentait une lymphadénopathie cervicale diffuse bilatérale et non douloureuse. L'examen buccal a révélé d'importantes caries dentaires et une maladie parodontale. Les résultats du bilan de laboratoire de la patiente sont indiqués au tableau 1. Une aspiration d'un ganglion lymphatique et une biopsie de moelle osseuse n'ont pas permis d'établir un diagnostic. La patiente devait subir une biopsie ganglionnaire chirurgicale, mais, lorsqu'elle a été examinée un mois plus tard, la lymphadénopathie avait disparu spontanément. Sur la base de ces constatations, on a diagnostiqué chez elle la maladie de Kikuchi-Fujimoto. Lors de l'examen de suivi, un an et demi plus tard, elle ne présentait aucun signe de récurrence.

## Patiente 2

Deux ans après la manifestation initiale chez la première patiente, on a évalué sa sœur plus jeune, âgée de 19 ans, qui présentait depuis trois semaines une enflure des glandes du cou, des sueurs nocturnes, une diminution de l'appétit et une perte de poids. Cette sœur présentait également de graves maladies dentaires et parodontales. Une tomodynamométrie (TDM) du cou a révélé une grave lymphadénopathie bilatérale, dont le

plus grand nœud lymphatique mesurait 2,6 × 1,2 × 2,6 cm. En outre, la tomodynamométrie a révélé une lymphadénopathie modérée dans les régions médiastinale, hilare droite, axillaire et pelvienne. Les résultats du bilan de laboratoire sont présentés dans le tableau 1. Une biopsie exérèse d'un ganglion lymphatique cervical et une biopsie de la moelle osseuse ont été réalisées. Un mois après la manifestation de la maladie, les symptômes et signes que présentait la patiente étaient disparus, et elle a pu rentrer à la maison. On a également diagnostiqué la maladie de Kikuchi-Fujimoto chez cette patiente. Lors du suivi, sept mois plus tard, l'examen physique de la patiente et les résultats de laboratoire étaient normaux.

Étant donné que les deux sœurs présentaient une maladie rare au même âge, le génotypage de l'antigène leucocytaire humain (HLA) a été réalisé pour déterminer si l'immunogénétique commune pouvait expliquer une prédisposition pour cette maladie. Les résultats sont indiqués dans le tableau 1.

## Conclusions sur la pathologie

Chez les deux sœurs, les résultats de l'examen de la moelle osseuse indiquaient qu'elle était normocellulaire pour toutes les lignées et ne présentait aucun signe de myélodysplasie ni les caractéristiques d'un infiltrat néoplasique. L'aspiration d'un ganglion lymphatique cervical chez la première sœur n'a pas permis d'établir un diagnostic. Chez la seconde sœur, une biopsie chirurgicale a révélé des zones géographiques de nécrose contenant des corps apoptotiques et un degré frappant de caryorrhexis avec débris nucléaires (figure 1). Les cellules dans les zones de nécrose étaient très prolifératives; plus de 60 % des cellules se sont révélées positives pour le marqueur de prolifération Ki-67. Le matériel cellulaire comprenait un grand nombre d'histiocytes (CD68 positif et myéloperoxydase positive), certains ayant des noyaux en forme de croissant, ainsi que de grands lymphocytes transformés (principalement des cellules T CD8 positives) (figure 2). On n'a pas observé de neutrophiles et on a observé seulement quelques plasmocytes. Les épreuves de coloration

### POINTS IMPORTANTS

- La maladie de Kikuchi-Fujimoto est une maladie rare et parfois familiale qui devrait être considérée dans le diagnostic différentiel de la lymphadénopathie cervicale.
- La manifestation typique comprend de la fièvre, une leucopénie et une lymphadénopathie cervicale.
- Bien que la maladie de Kikuchi-Fujimoto tende à guérir spontanément et qu'aucun traitement définitif n'existe, une biopsie ganglionnaire est nécessaire pour exclure une tumeur maligne.
- Les patients doivent être suivis de près en raison du risque accru de récurrence de la maladie et de lupus érythémateux systémique.

pour les organismes (réaction à l'acide périodique Schiff, coloration à la méthénamine d'argent Gömöri et méthode de coloration de Ziehl-Neelsen) se sont révélées négatives. Aucun élément de preuve morphologique de malignité n'a été observé.

**Tableau 1:** Résultats des analyses de laboratoire chez deux patientes présentant la maladie de Kikuchi-Fujimoto

| Investigation                                                            | Patiente 1 | Patiente 2                           |
|--------------------------------------------------------------------------|------------|--------------------------------------|
| Nombre de leucocytes, $\times 10^9/L$ (normal 4,5–11)                    | 2,8        | 1,9                                  |
| Nombre de lymphocytes, $\times 10^9/L$ (normal 1,0–3,3)                  | 0,88       | 0,50                                 |
| Nombre de neutrophiles, $\times 10^9/L$ (normal 1,7–7,6)                 | 1,66       | 1,30                                 |
| Nombre de plaquettes, $\times 10^9/L$ (normal 1140–440 $\times 10^9/L$ ) | 226        | 244                                  |
| Hémoglobine (normal 120–160 g/L)                                         | 109        | 107                                  |
| Volume cellulaire moyen (normal 80–98 fL)                                | 83,7       | 83,2                                 |
| SGOT (normal 10–32 U/L)                                                  | 67         | 62                                   |
| SGPT (normal 0–25 U/L)                                                   | 29         | 18                                   |
| PA (normal 30–120 U/L)                                                   | 76         | 112                                  |
| Bilirubine totale (normal 3–18 $\mu\text{mol/L}$ )                       | 8          | 4                                    |
| LDH (normal < 200 U/L)                                                   | 1128       | 1352                                 |
| VS (normal 0–30 mm/h)                                                    | 31         | Non effectué                         |
| CMV IgM                                                                  | Négatif    | Négatif                              |
| CMV IgG                                                                  | Positif    | Non effectué                         |
| Sérologie hépatite C                                                     | Négatif    | Négatif                              |
| Hépatite B sAg                                                           | Négatif    | Négatif                              |
| Sérologie VIH 1/2                                                        | Négatif    | Négatif                              |
| EBV IgM                                                                  | Négatif    | Négatif                              |
| Sérologie <i>Bartonella henselae</i>                                     | Négatif    | Négatif                              |
| Sérologie <i>Francisella tularemia</i>                                   | Négatif    | Non effectué                         |
| Coloration d'expectoration pour les mycobactéries                        | Négatif    | Négatif                              |
| Anticorps anti-nucléaires                                                | Négatif    | Positif (1:160); test répété négatif |
| Anticorps SSA (Ro)                                                       | NA         | Positif                              |
| Anticorps SSB (La)                                                       | NA         | Négatif                              |
| Anticorps Sm                                                             | NA         | Positif                              |
| Anticorps RNP/Sm                                                         | NA         | Positif                              |
| Anticorps Scl-70                                                         | NA         | Négatif                              |
| Anticorps JO-1                                                           | NA         | Négatif                              |
| ADN double brin                                                          | NA         | Négatif                              |
| HLA-A                                                                    | 02         | 02, 31                               |
| HLA-B                                                                    | 39, 35     | 39, 51                               |
| HLA-Cw                                                                   | 7, 4       | 07, 15                               |
| HLA-DRB1                                                                 | 08, 14     | 08, 14                               |
| HLA-DQB1                                                                 | 03         | 03, 0402                             |

Remarque : PA = phosphatase alcaline, SGPT = sérum glutamopyruvique transaminase, SGOT = sérum glutamo-oxalacétique transaminase, CMV = cytomegalovirus, anti-ADNdb = anti-acide désoxyribonucléique double brin, VEB = virus Epstein-Barr, VS = vitesse de sédimentation, HLA = antigènes des leucocytes humains, LDH = lactase déshydrogénase, RNP = ribonucléoprotéine, Scl = sclérodémie, SS = Syndrome de Sjögren

## Discussion

La maladie de Kikuchi-Fujimoto est aussi appelée maladie de Kikuchi ou lymphadénite histiocytaire nécrosante. Elle a été décrite pour la première fois au Japon par Kikuchi et Fujimoto en 1972 et est maintenant signalée dans la plupart des régions du monde. Sa manifestation typique comprend de la fièvre, une adénopathie cervicale et une leucopénie, mais peut aussi inclure des sueurs nocturnes, des nausées, des vomissements et une perte de poids<sup>1</sup>. L'adénopathie est le plus souvent cervicale (79 % des cas), mais elle peut inclure n'importe quelle région des ganglions lymphatiques et peut être généralisée (encadré 1)<sup>1</sup>. L'âge médian au moment du diagnostic est de 30 ans. La plupart des patients (70 %) sont de jeunes adultes, mais la maladie peut survenir à presque tous les âges<sup>1,2</sup>. Les séries de cas déclarés révèlent une tendance marquée chez les femmes, le ratio hommes/femmes allant de 1:4 à 1:1,3<sup>1,3</sup>. La maladie est résolutive, n'a pas de traitement définitif et guérit spontanément sur une période de un à quatre mois. Le risque de récurrence est de 3 % à 4 % et celle-ci peut se produire plusieurs mois ou plusieurs années après le premier diagnostic<sup>4</sup>.

La manifestation de la maladie de Kikuchi-Fujimoto imite de près celle du lymphome et la maladie est souvent mal diagnostiquée en tant que telle. Les patients subissent souvent toute une batterie d'examen pour des maladies infectieuses, néoplasiques et auto-immunes avant qu'un diagnostic de maladie de Kikuchi-Fujimoto soit considéré. Le diagnostic différentiel de cette maladie est indiqué dans l'encadré 2<sup>1,2</sup>. Le diagnostic ne peut être établi à l'aide des modalités de labora-

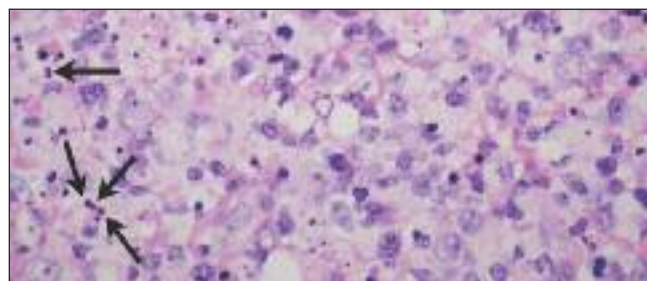

Figure 1 : Vue microscopique d'un échantillon de biopsie ganglionnaire prélevé sur la patiente 2 (coloration hématoxyline et éosine, grossissement  $\times 630$ ) montrant des histiocytes réactifs contenant des débris sphériques caryorrhexiques de coloration foncée (flèches), un manque de cellules neutrophiles ou malignes et relativement peu de cellules plasmiques.

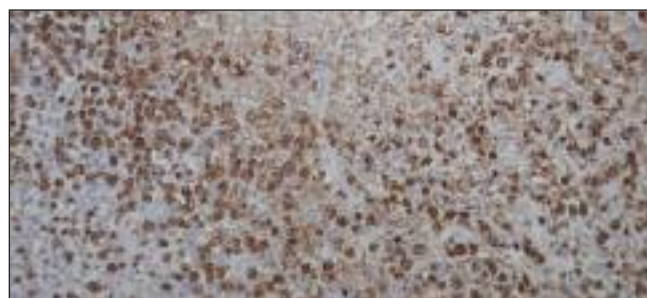

Figure 2 : Vue microscopique d'un échantillon de biopsie ganglionnaire prélevé sur la patiente 2 (coloration CD68, grossissement  $\times 200$ ) soulignant de nombreux histiocytes ou macrophages de coloration brune.

toire et de diagnostic standard; une biopsie ganglionnaire est nécessaire. Les critères histologiques de la maladie de Kikuchi-Fujimoto sont énumérés dans l'encadré 3<sup>1,3,5</sup>.

La maladie de Kikuchi-Fujimoto a été diagnostiquée en association avec divers virus, bactéries et parasites, mais, pour l'instant, aucun lien de causalité n'a été clairement démontré<sup>1,3,5</sup>. La maladie de Kikuchi-Fujimoto partage de nombreuses caractéristiques avec le lupus érythémateux systémique, notamment des schémas cliniques, épidémiologiques et histologiques similaires. Les patients qui ont eu un épisode de la maladie de Kikuchi-Fujimoto peuvent présenter un risque accru de lupus érythémateux systémique dans l'avenir, même si l'ampleur de ce risque est inconnue<sup>6</sup>.

#### Encadré 1: Prévalence des caractéristiques de la maladie de Kikuchi-Fujimoto<sup>1</sup>

- Lymphadénopathie (100 %)
- Leucopénie (43 %)
- Vitesse de sédimentation élevée (40 %)
- Fièvre (35 %)
- Anémie (23 %)
- Éruption cutanée (10 %)
- Perte de poids (10 %)
- Fatigue (7 %)
- Douleurs articulaires (7 %)
- Sueurs nocturnes, nausées, vomissements ou diarrhée (< 7 %)

#### Encadré 2 : Diagnostic différentiel de lymphadénopathie cervicale<sup>1,2</sup>

##### Lymphadénite infectieuse

- Virus de l'herpès simplex
- Virus d'Epstein-Barr
- Cytomégalovirus
- Maladie des griffes du chat (*Bartonella henselae*)
- Infection à streptocoque du groupe A
- Infection au *Staphylococcus aureus*
- Bacille de Koch
- Toxoplasmose
- Tularémie (*Francisella tularensis*)

##### Néoplasie

- Lymphome non hodgkinien
- Lymphome hodgkinien
- Carcinome métastatique

##### Lymphadénite de lupus érythémateux systémique

##### Maladie de Kawasaki

##### Maladie de Kikuchi-Fujimoto

#### Encadré 3 : Caractéristiques de la maladie de Kikuchi-Fujimoto sur biopsie des ganglions lymphatiques<sup>1,3,5</sup>

- Érosion des tissus lymphatiques
- Foyers nécrotiques éosinophiles fibrogènes circonscrits avec augmentation de la caryorrhexis
- Histiocytes entourant les foyers nécrotiques
- Débris nucléaires
- Augmentation des lymphocytes (principalement des cellules T CD8 positives)
- Absence de granulocytes
- Manque de plasmocytes

## Le génotypage de l'antigène leucocytaire humain

On recense peu de cas signalés de la maladie de Kikuchi-Fujimoto familiale ou d'associations familiales dans la documentation publiée<sup>4,7-9</sup>. Le génotypage de l'antigène leucocytaire humain (HLA) visant à déceler la maladie de Kikuchi-Fujimoto familiale a été signalé dans un seul article<sup>4</sup>. Les sœurs dont il était question dans cet article partageaient certains génotypes HLA, tout comme les sœurs dont il est question ici; pour nos deux patientes, les résultats pour le HLA-Cw7 étaient positifs et, pour la sœur aînée (patiente 1), les résultats pour le HLA-B35 étaient également positifs. Aucun de ces génotypes n'est connu pour être associé à un risque accru de maladie de Kikuchi-Fujimoto familiale<sup>7</sup>.

Une exposition environnementale partagée peut également expliquer la coïncidence de diagnostic de maladie de Kikuchi-Fujimoto chez ces sœurs. Les deux sœurs vivaient dans une réserve éloignée du Nord de l'Ontario et étaient autochtones. Étant donné qu'elles avaient toutes deux une très mauvaise dentition, de même qu'une parodontite associée, des micro-organismes périoraux peuvent avoir déclenché cette maladie. Cependant, aucune association entre l'infection buccale et l'apparition de la maladie de Kikuchi-Fujimoto n'a été signalée; aussi, cette hypothèse reste à étudier.

## Conclusion

Bien que rare, la maladie de Kikuchi-Fujimoto doit être considérée dans le diagnostic différentiel de la lymphadénopathie cervicale. En particulier, elle peut être confondue avec un lymphome malin. La contribution des facteurs génétiques ou environnementaux dans l'apparition de la maladie de Kikuchi-Fujimoto reste inconnue. Bien que la maladie soit résolutive, il est important d'assurer un suivi à long terme afin de surveiller la récurrence de la maladie ou l'apparition de maladies auto-immunes, telles que le lupus érythémateux systémique.

## Références

1. Kucukardali Y, Solmazgul E, Kunter E, et coll. « Kikuchi-Fujimoto disease: analysis of 244 cases ». *Clin Rheumatol* 2007;26:50-4.
2. Dorfman RF, Berry GJ. « Kikuchi's histiocytic necrotizing lymphadenitis: an analysis of 108 cases with emphasis on differential diagnosis ». *Semin Diagn Pathol* 1988;5:329-45.
3. Lin HC, Su CY, Huang CC, et coll. « Kikuchi's disease: a review and analysis of 61 cases ». *Otolaryngol Head Neck Surg* 2003;128:650-3.
4. Amir AR, Amr SS, Sheikh SS. Kikuchi-Fujimoto Disease: report of familial occurrence in two human-leukocyte antigen identical non-twin sisters ». *J Intern Med* 2002;252:79-83.
5. Tsang WY, Chan JK, Ng CS. « Kikuchi's lymphadenitis: a morphological analysis of 75 cases with special reference to unusual features ». *Am J Surg Pathol* 1994;18:219-31.
6. el-Ramahi KM, Karrar A, Ali MA. « Kikuchi disease and its associations with systemic lupus erythematosus ». *Lupus* 1994;3:409-11.
7. Ifeacho S, Aung T, Akinsola M. « Kikuchi-Fujimoto disease: a case report and review of the literature ». *Cases J* 2008;1:187.
8. Atarashi K, Yoshimura N, Nodera H, et coll. « Recurrent histiocytic necrotizing lymphadenitis (Kikuchi's disease) in an human T lymphotropic virus type I carrier ». *Intern Med* 1996;35:821-5.
9. Kikuchi M, Takeshita M, Eimoto T, et coll. « Histiocytic necrotizing lymphadenitis: clinicopathologic, immunologic, and HLA-typing study ». Dans: Hanaoka M, Kadin M, Mikata A, dir. « *Lymphoid malignancy* ». New York (NY): Field and Wood; 1990. p. 251-7.

**Affiliations :** De la Faculté de médecine (Stasiuk), Département de médecine interne (Teschke, Seftel), Département de pathologie (Williams), Université du Manitoba, Winnipeg, Man.
